# Supplementary material
Source: MDPI journal article supplement (https://www.mdpi.com/2073-4395/11/9/1695)
Supplement: s1 [file s1]

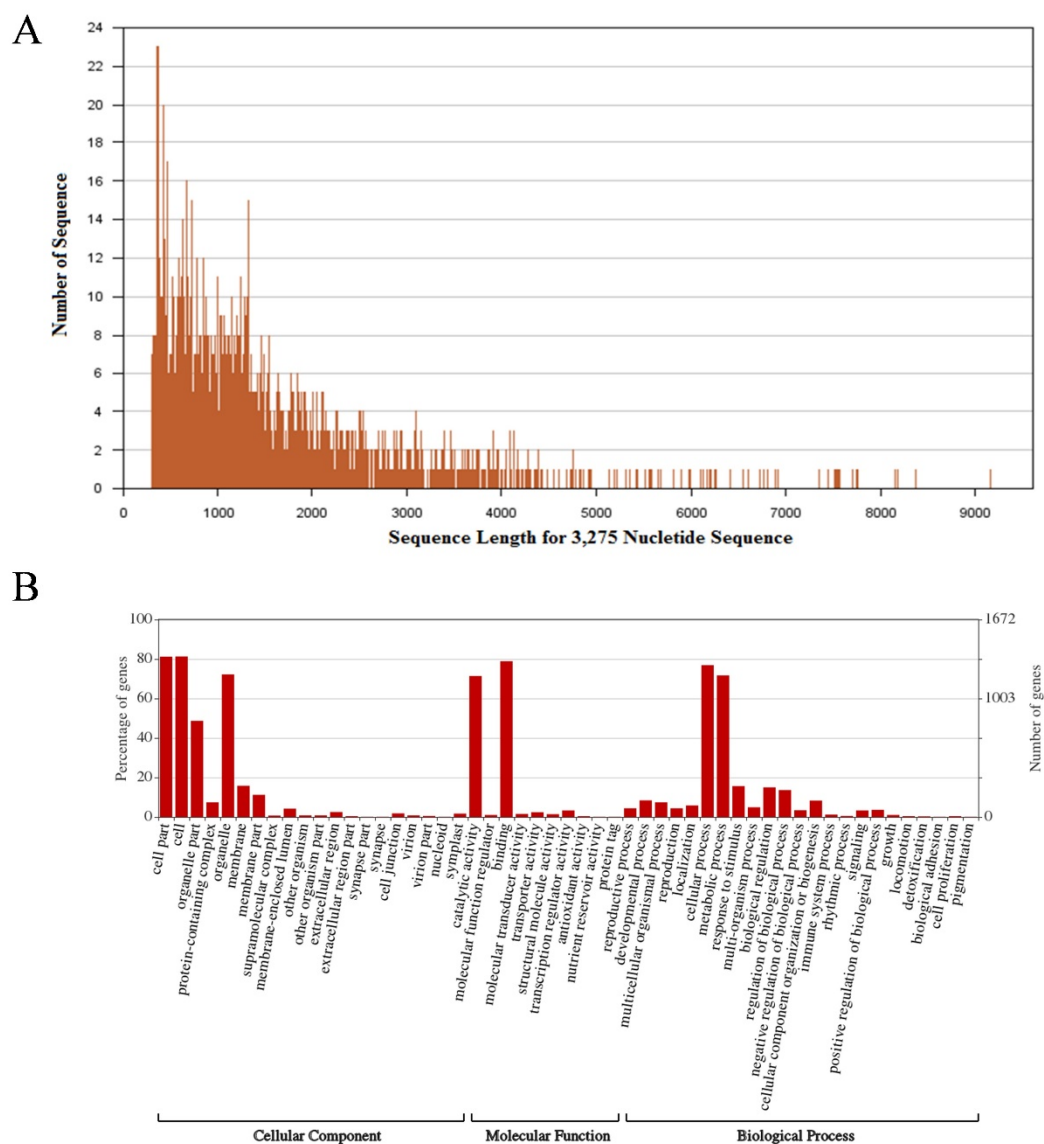

**Figure S1.** Sequence length distribution of 3275 coding genes (A) and their Gene Ontology classification (B).

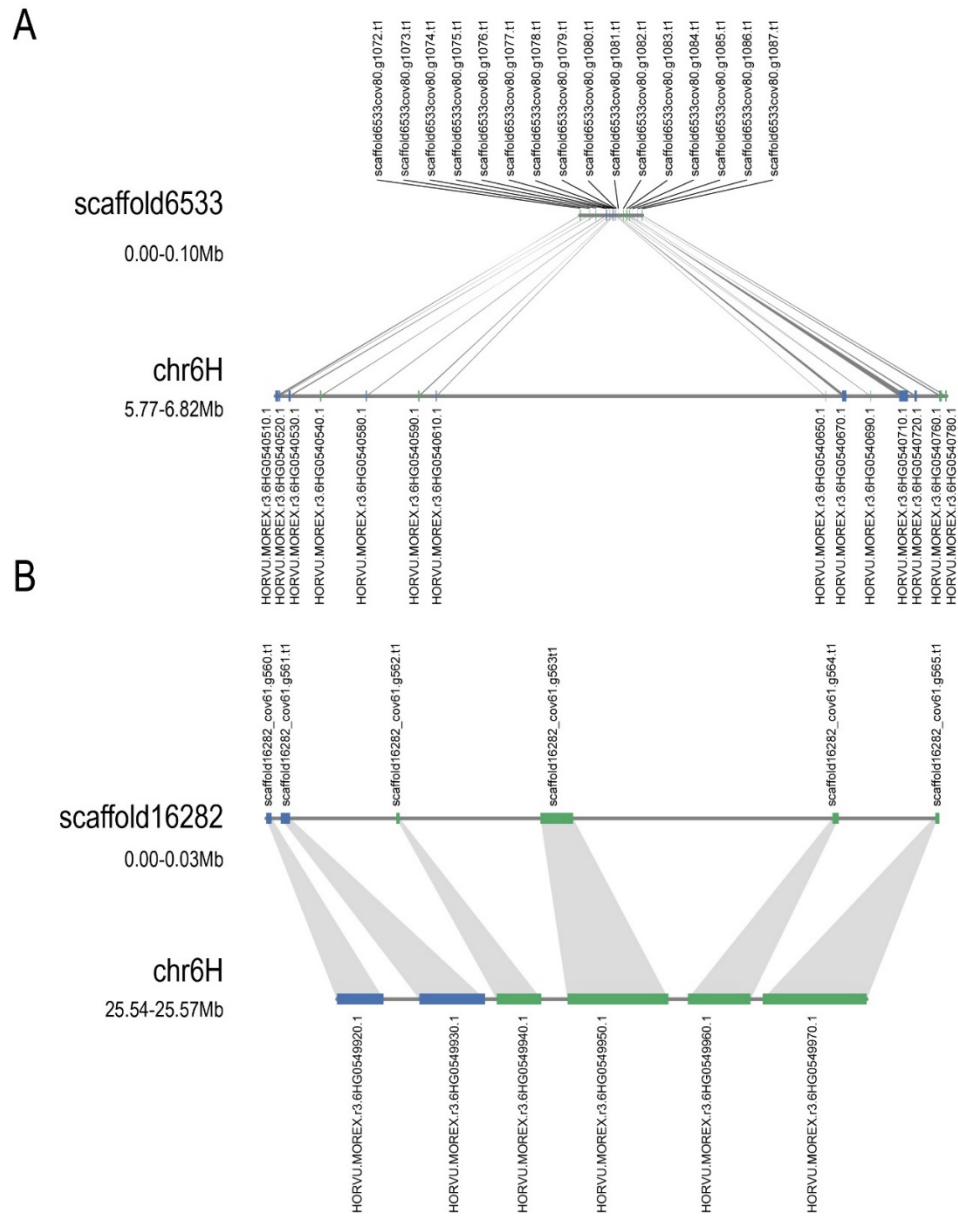

**Figure S2.** Microsynteny between two scaffolds scaffold6533 (**A**) and scaffold16282 (**B**) and their respective collinear counterparts in barley.

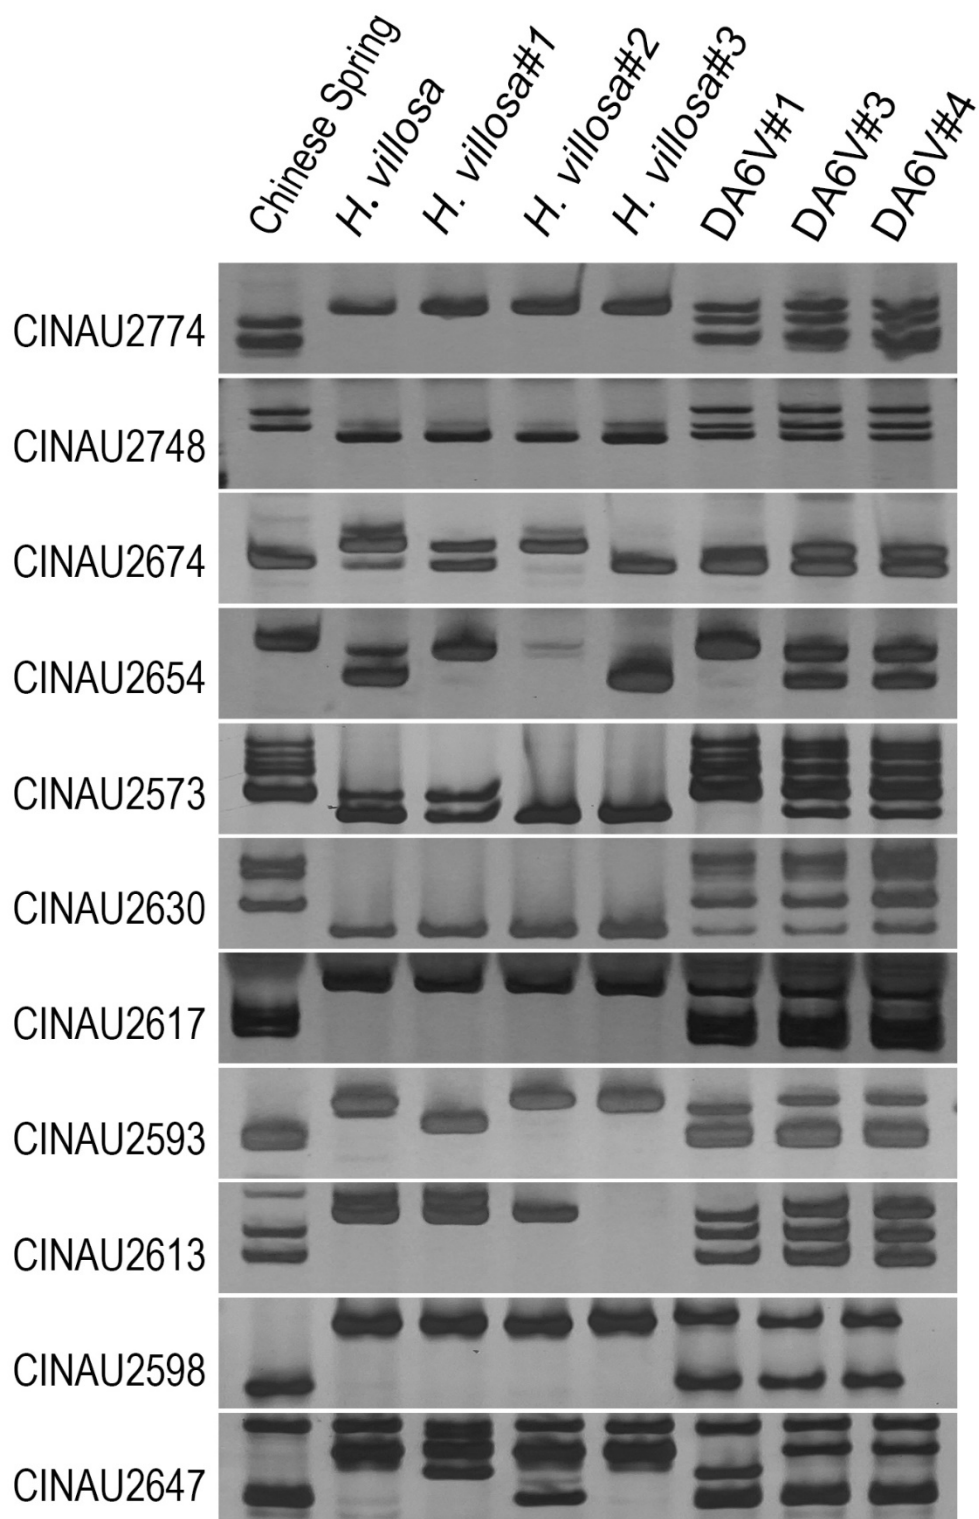

**Figure S3.** The amplification results of representative markers in four *Haynaldia villosa* lines and three *H. villosa* 6VS additional lines.

**Table S1.** Markers specific for short arm of *H. villosa* 6V chromosome.

| Marker    | Forward primer(5'-3')   | Reverse primer(5'-3')     |
|-----------|-------------------------|---------------------------|
| CINAU2570 | AGGTGGTGATTTCAGAGGCA    | CCGTGAAAAGCTAGACTCTGC     |
| CINAU2572 | GGTGAAGGTCATGGGCAAAT    | TGACCAGTGGATCAACTTTGC     |
| CINAU2573 | AGAAGTTGCATACCGGTTCA    | TAACCATTGGCTTCGCATCG      |
| CINAU2576 | GCTCAATGATGGTCCACTTGA   | CGCCCAACTTCAAGCTCAG       |
| CINAU2580 | GAATGCGTGATCTTGGTGGG    | TCAGCCTTCTTTATTTCAACCTG   |
| CINAU2581 | AACATGATGCCTGCCAGATG    | GGTTTTGGACTCTTTGGCACT     |
| CINAU2582 | CATATTGGACAGCGGCGAC     | CTGGGGTTTCAGGAGGATCA      |
| CINAU2583 | GCCATCTGTAATTTATCCGACGT | CCAAGCTTTAGGGTGAACAATCT   |
| CINAU2586 | TGGCATCATTACTGCTGTTGG   | CGGATCCAAGAAATACCGCC      |
| CINAU2588 | TCTACGAGCCTTGGACTGC     | CCATCCTCTTCCTGCATTCTT     |
| CINAU2591 | GTAAGAAAGCCGGAGACTATGA  | TCAAGTCTTTCCTTTTGTGTCATGG |
| CINAU2592 | TTCTAGTGACATGCGGTGCT    | GCACCATCTAGACACTCAGGA     |
| CINAU2593 | GGCTTGGACTGCAGTAATGC    | TGGTCACGATGGCATCTAGT      |
| CINAU2594 | TCTTTCTAGCCAAACAGTCGT   | TGTGATGTCATCCGTACGAGT     |
| CINAU2598 | TTGTGTGATTTAACTGCCAGTG  | GAGGATGCTCACTGTTTGCC      |
| CINAU2599 | TCGTCTTTGTGCTCCTCGT     | AGCTGTTTATCCGTCATCCAT     |
| CINAU2600 | AGTCCCCAGAGAAGGTTTCAG   | TCTTCTCTTCCAAGGCCCTC      |
| CINAU2601 | TATCTGGCCCCGTGTGTTTT    | TCACTGAACACACGGAAAACC     |
| CINAU2605 | TGGGACCATGATACATTTGGAA  | CACCTTGCAGCACATATGTATCT   |
| CINAU2611 | CATCTTGCAGGGGACAACAG    | AGATGCCTCTCCTGCTTGC       |
| CINAU2612 | GCTGCGAGAAATGTTTGGCT    | GCTTTGCAAGAACATGGTAGTG    |
| CINAU2613 | GCCATCATCGATTTCTTCTTCCT | ATCCCTCTTCTTTCCCCACA      |
| CINAU2614 | AGAACATTGCTAGCTTTCAGGT  | TTTGGCCCAATGGTTCACAG      |
| CINAU2615 | TCGAAGAATGCAGAAGATGACT  | TCAAAGTCAGAGTGGGGTCC      |
| CINAU2616 | TCAAGCTTGCATTTGATGAGGA  | TCTTTCGTCACTCAAAGCGC      |
| CINAU2617 | GGATTGTGGGGAGCTTGTTG    | TCTTCATTACCTTCGTCTTCAGA   |
| CINAU2618 | GGAGAAGCACTATTCAAGGTACA | GTTACCTGTTACTCTGCTACC     |
| CINAU2619 | GCCGAATCTGCTACTTGTGT    | AGGCTCTTGTACTTCATCCTCA    |
| CINAU2620 | AAGTGCAGACAATGGATGGG    | AAGGCAATCAACAGCATCATG     |
| CINAU2622 | CCCCAACTTTGAGTCACATGA   | AGTCCAACACATCTGCTCCA      |
| CINAU2623 | AGCGAGTCTTCTAGGAGGGT    | CATCGTTATGGCCAACACCC      |
| CINAU2624 | GGTTCAAAGGAGGCTGCATG    | TTTCCCTGGGCTTCAATCCT      |
| CINAU2625 | AGCGTAATCCATACCCTGACA   | CCCTCGGTGGTCTATCAGAG      |
| CINAU2626 | TGGGAGCATGTCACCAATCA    | CCCCTGTAGCAAAACATTCCA     |
| CINAU2627 | AACTGGTGGGTGTTTCATTGC   | TCACCATAAGATTTGCAGCGT     |
| CINAU2630 | AATTGCAACCGTCAACCACA    | ATCGATTTCTCCCAAGCTAGTT    |
| CINAU2631 | CGCTTTGCAGACATAATTGCA   | CGGACATAGGAGGACGGAAC      |
| CINAU2632 | AACGAGTTCCTTGGGCATAG    | TGCTGTCTGTGCGGATCAACA     |
| CINAU2633 | CTGGATGTTCAAGGGTGTGG    | TCGTTGTCAACTTTCTGCAGT     |

|           |                          |                         |
|-----------|--------------------------|-------------------------|
| CINAU2634 | CAGTCGCAAATAAAAGGATGATGC | TCTCTTCAGCTAGGCCAACC    |
| CINAU2635 | TCGCGAGGAAGAAGAAGGAG     | TCAACAAACGACAGGCTTCT    |
| CINAU2643 | ACATAATTCCTAGCTCCACTGGT  | GCCTAAAATGCCTTTCAGTGC   |
| CINAU2645 | GAGGATATTCTCGCACATGTTTG  | GCTTGGAGATGTGTCACTGG    |
| CINAU2646 | CATTCGCTCCGTGTGTGTC      | TGAGCGATGATGATTTCCAGC   |
| CINAU2647 | GTGCTCCGGTCCAAGAGG       | GATCCCGTAGTAGGCCATCC    |
| CINAU2648 | GGAAGCTCTCAACCTTATTTTCGG | CAGTTCATTCCCTGGTCCAAC   |
| CINAU2650 | CATGGTCTTGTTTTGCGGAA     | AGCCAAAACCTCAGGTATCATCG |
| CINAU2651 | ATTCAGATTGGGGTGCACTG     | CCTCGACGCATCATAGGTGT    |
| CINAU2652 | GACTGGTGGATCATGGGCTA     | ATACGCTGGCCATGCTTTTG    |
| CINAU2654 | GCGGATGGAAAATGTCAAGGA    | TGAACCTCAAGATCCGGCTT    |
| CINAU2656 | TTCGGCTACAGACATGAGGT     | CCAGGTGCTTTGCTGATGG     |
| CINAU2658 | CGATCTAGGCCTCAAGACGA     | CCGTATACCTGAGTCCACCC    |
| CINAU2663 | CGATTGTGATGTTGATGCACC    | AATGTTGTTGTGGCTCCAGG    |
| CINAU2664 | TGTTGATAATGGAAGCGGAAACT  | AAGCAGCTCAGGGACGAAAT    |
| CINAU2665 | TGCATATGGTTCCCTTCTTCTG   | CCTGAGTTGAACCTGGTAATGAC |
| CINAU2666 | GGTGAGCTTGATGACCTCGA     | CACATCCTTGCAGATCCGC     |
| CINAU2670 | CACCATCCTCGACGTCTCC      | ATGAACATCCGGCACAGGG     |
| CINAU2671 | TGCAAGCAGGAACAGATGTA     | TCCTTCAATTCCTTCCTCAGCT  |
| CINAU2672 | GTCTCTACATGCTGCCGTTG     | TGCTTCGAAACTGAACCATTC   |
| CINAU2674 | CACCTCTCCCTCGACGAG       | AGACGACCTTGTAGTTCCGG    |
| CINAU2675 | AGGCTGTTCTGAAGGAGGTC     | CAACAGGTTACCAGCATCCA    |
| CINAU2676 | CGGCCCAATTACACCAACTG     | TGGATGAGGACAGTACAGATCC  |
| CINAU2679 | AAGATGCTGCCAACTCTGC      | TGATGCAGAGCCTCTTCAGA    |
| CINAU2681 | CTGTTGCTTCTTGGACCACC     | CTCTTCCTCGAAACGCTCAC    |
| CINAU2683 | AGATCTCTTTAGGGATGCGCT    | CCAACCTGTAAGCTGCGC      |
| CINAU2684 | CATGTCGCTCAATCTGGCAG     | GCGAGGCAGAAAATCATCCT    |
| CINAU2685 | ACTAATTCACTTTTTCGGCTCGT  | GGCAATCTACTTATCCCTGCA   |
| CINAU2686 | CTCGGCTACCTGGAGACG       | GGCCACTTTTGTTACCCCAG    |
| CINAU2687 | CCCGTGTTCTACTTGACGAG     | TTTTCCAGGTGCGCACAATT    |
| CINAU2689 | ACACGTTCTGATTTGGCCAA     | GCAAGCATAGCAAAGTTTCCG   |
| CINAU2690 | TGGAAGTTGTGAGACTAGATTGC  | TCCCGCTTCCCTCTCCAG      |
| CINAU2692 | AGCACAAAAGACGCATAGCA     | GCGTTCATCATCCTCTAGCC    |
| CINAU2695 | TACTATGGCTTCACGACGCC     | CAGCTTGCTTGACTTCTTCGA   |
| CINAU2700 | CGTCTTTGATGATGATTCCCTGG  | CTGACTCCTGCAGCTGATTG    |
| CINAU2701 | GGTACGGGAGGAAATTCAGAAC   | TTTGCGGCATCAACAAGCTT    |
| CINAU2702 | TGGAAGAAGATGCTGGCAAG     | ACAATCTCAAGCAAAGGTACACC |
| CINAU2706 | TAGGGGATCGCTTTGAGGAG     | TGCTTCTCTGTACTGTCCCA    |
| CINAU2707 | CCTAATGGCTCTGACTCGAG     | TGCAGTGCTAGTAGTGTCTTG   |
| CINAU2708 | TGATCCAAATGCCCCAGGT      | CTTCTCATTCTGCCGCTGTC    |
| CINAU2710 | TGAGCCCTATCAATCATCTCAAG  | TGCATGAATACAAGTGGAGCTC  |
| CINAU2711 | ACATTTTGCCACACCTCAGG     | AATACACTGGCAGGATTCCC    |
| CINAU2712 | CCTGGGTGGTGGTACTTTTG     | TGTGGTCAAAGTCCTCACCT    |
| CINAU2713 | AGGAGAACTGTTTCATGCTGGA   | CTTGGTGTCCGGAACCCT      |

|           |                         |                         |
|-----------|-------------------------|-------------------------|
| CINAU2716 | TCAAAACTGAGGAGGAAGCAA   | TCTTTGTAAACATGTATGCGGCT |
| CINAU2719 | AGGGTTCGAAAGTTCAAGAA    | CCTCCAGCTTCTCAATCTTCTC  |
| CINAU2722 | AGCCATTCCAATTTACTTTTGCA | TATCCAAACCCTCAACCCGT    |
| CINAU2728 | GGTACCTTGTTTCTGTGGACTC  | ACTCCTCTGTATCAGCAAGCT   |
| CINAU2732 | GGTCACCTGTACAACAACATGA  | CGACAGGTACCTTGAAGACCT   |
| CINAU2733 | AGGACTCTGGCAATCACGTG    | CCGACATCTTTCATCTCCTTCC  |
| CINAU2735 | AGGAGGCCTTCATGCAGATA    | CACCATTTCCACCGACAACC    |
| CINAU2741 | TGAAGTGTCAGTGCCCTTCT    | CGTCGCGTATATGTGAAGGG    |
| CINAU2742 | GGAAAGGAACATTTGGAAGCCT  | AGCCAATCCTTCATCGAGTCA   |
| CINAU2745 | TGAAGTGTCAGTGCCCTTCT    | CGTCGCGTATATGTGAAGGG    |
| CINAU2746 | CCGCCTCCTACCTCAAGATC    | TGGTCTGTAATCCCAACGGT    |
| CINAU2747 | AGATACTGGCCCTGTTCGC     | TCGATCGCAACACTTTCACC    |
| CINAU2748 | GCCGTCGAGCTCCTAGGA      | CATGTGCCAAGGTGAGATCC    |
| CINAU2749 | GTGTGGAAGGGCAGCTATTG    | GCCGTCTGAAGAAGCAACAC    |
| CINAU2750 | GACATCGCCAAGTCTCAGGA    | TCCTTCATGAATTCTGCAGCA   |
| CINAU2752 | TTCCACTTCTGCTGCCTCTC    | CTCCCTGCTCCACCACATG     |
| CINAU2753 | GCTTCACTTCTGTAACTGCA    | TGCTTCCTCCCTTGTTTCAGA   |
| CINAU2755 | AGTTTGAGAAGTTTGCCGCA    | CCAACTGCTTCGCGATTG      |
| CINAU2756 | TGCAGGGTCACATCCAATTG    | CTGGAAGATCTCAGCCCCAA    |
| CINAU2757 | GCTTCCTTTCGGTGGCTG      | TGCTTCCCTTCAAGATTGGTG   |
| CINAU2758 | GCTCCAGGTGCAAATCTGTT    | GCCCTTGCCTCCAGTGTATA    |
| CINAU2759 | TACCTCATCTACACCCCGAC    | CAGGCAGAAGTTGGAGTCCT    |
| CINAU2760 | AGAAGACCCGGAAAACAAGC    | AGGACAAAGCATACCCCACT    |
| CINAU2762 | TCAGAGGGACATGGAGTTGG    | CACATCCCCATCCCTTGTCT    |
| CINAU2763 | GCCGAAATCCAGTTTGCAGA    | ACCATGTCCAACAGCACCAT    |
| CINAU2764 | GAGAGTTCGAGGTGGTCCC     | GCCACTGCCGTAATCCTC      |
| CINAU2767 | CATCACTGCCCTTGGGTTTC    | TGCAGCAGTAATGATCATCGC   |
| CINAU2768 | AGCAGCAGTGGTTTCAAAGG    | ACGTCCGTGCCATTGAGAA     |
| CINAU2769 | CATTGCTTGGTGGAGGTTCA    | GCGTTGTTCTCATACTCCATCC  |
| CINAU2771 | CGTCACGTTCTCAGGCAATA    | GCAATGTTGAAGTCGCCCT     |
| CINAU2773 | GCTTGCGTGGTCCATCTG      | TCCTTCAAAGAGGTCCACC     |
| CINAU2774 | GCTTTTGAGGGGTTGCTGAA    | TCTGAAGGCTTCTCATACGCA   |
| CINAU2777 | GCTGATTTTGCTCAATTTTGGG  | TCCTTGTATGGTGCCTCGAG    |
| CINAU2779 | CGCAGATCTACATACCTACACC  | AGTCAAGCCCTCTCGATTCC    |
| CINAU2784 | CTTTGGCTTGTTTCTCTTGCT   | GGTCTGGGGAAGTGAATGA     |
| CINAU2785 | AGTGATCTTGGCTCTGGTCC    | CAAGTCTCAAAGGTCCCAGC    |
| CINAU2787 | CGCAACCATAAACCCTCCA     | TCTTCCGATCGTCCACAAGA    |

---

**Table S2.** The amplification results of all IT markers in multiple *Haynaldia villosa* lines.

| IT Markers | CS | <i>H.villosa</i> | <i>H.villosa</i><br>#1 | <i>H.villosa</i> #<br>2 | <i>H.villosa</i> #<br>3 | DA6V<br>#1 | DA6<br>V#3 | DA6<br>V#4 |
|------------|----|------------------|------------------------|-------------------------|-------------------------|------------|------------|------------|
| CINAU2570  | √  | √                | √                      | √                       | √                       | √          | √          | √          |
| CINAU2671  | √  | -                | √                      | √                       | √                       | √          | √          | √          |
| CINAU2672  | √  | √                | √                      | √                       | √                       | √          | √          | √          |
| CINAU2674  | √  | √                | √                      | √                       | √                       | √          | √          | √          |
| CINAU2675  | √  | √                | √                      | √                       | X                       | √          | √          | √          |
| CINAU2676  | √  | √                | √                      | √                       | √                       | √          | √          | √          |
| CINAU2580  | √  | √                | √                      | √                       | √                       | √          | √          | √          |
| CINAU2679  | √  | √                | √                      | √                       | √                       | √          | √          | √          |
| CINAU2681  | √  | √                | √                      | √                       | √                       | √          | √          | √          |
| CINAU2683  | √  | √                | √                      | √                       | √                       | √          | √          | √          |
| CINAU2684  | √  | √                | √                      | √                       | √                       | √          | √          | √          |
| CINAU2685  | √  | √                | √                      | √                       | √                       | √          | √          | √          |
| CINAU2687  | √  | √                | √                      | √                       | √                       | √          | √          | √          |
| CINAU2581  | √  | √                | √                      | -                       | -                       | √          | √          | √          |
| CINAU2689  | √  | √                | √                      | √                       | √                       | √          | √          | √          |
| CINAU2692  | √  | √                | √                      | √                       | √                       | √          | √          | √          |
| CINAU2695  | √  | √                | √                      | √                       | √                       | √          | √          | √          |
| CINAU2582  | √  | -                | √                      | √                       | √                       | √          | √          | √          |
| CINAU2700  | √  | √                | √                      | √                       | √                       | √          | √          | √          |
| CINAU2702  | √  | √                | √                      | √                       | √                       | √          | √          | √          |
| CINAU2706  | √  | √                | √                      | √                       | √                       | √          | √          | √          |
| CINAU2710  | √  | √                | √                      | √                       | √                       | √          | √          | √          |
| CINAU2716  | √  | √                | √                      | X                       | √                       | √          | √          | √          |
| CINAU2722  | √  | √                | √                      | √                       | √                       | √          | √          | √          |
| CINAU2728  | √  | -                | X                      | √                       | √                       | √          | √          | √          |
| CINAU2732  | √  | -                | -                      | √                       | √                       | √          | √          | √          |
| CINAU2735  | √  | √                | √                      | √                       | -                       | √          | √          | √          |
| CINAU2586  | √  | √                | √                      | √                       | √                       | √          | √          | √          |
| CINAU2741  | √  | -                | √                      | √                       | √                       | √          | √          | √          |
| CINAU2741  | √  | -                | X                      | X                       | X                       | X          | √          | √          |
| CINAU2742  | √  | -                | √                      | √                       | √                       | -          | √          | √          |
| CINAU2746  | √  | √                | √                      | √                       | √                       | √          | √          | √          |
| CINAU2747  | √  | -                | -                      | √                       | √                       | √          | √          | √          |
| CINAU2748  | √  | √                | √                      | √                       | √                       | √          | √          | √          |
| CINAU2749  | √  | √                | √                      | √                       | √                       | √          | √          | √          |
| CINAU2750  | √  | √                | √                      | √                       | √                       | √          | √          | √          |
| CINAU2752  | √  | -                | -                      | √                       | √                       | √          | √          | √          |
| CINAU2753  | √  | √                | √                      | √                       | √                       | √          | √          | √          |
| CINAU2757  | √  | √                | √                      | √                       | √                       | √          | √          | √          |

|           |   |   |   |   |   |   |   |   |
|-----------|---|---|---|---|---|---|---|---|
| CINAU2774 | √ | √ | √ | √ | √ | √ | √ | √ |
| CINAU2777 | √ | √ | √ | √ | √ | √ | √ | √ |
| CINAU2779 | √ | √ | √ | √ | √ | √ | √ | √ |
| CINAU2784 | √ | √ | √ | √ | √ | X | X | X |
| CINAU2592 | √ | √ | √ | √ | √ | √ | √ | √ |
| CINAU2593 | √ | √ | √ | √ | √ | √ | √ | √ |
| CINAU2594 | √ | X | √ | X | √ | √ | √ | √ |
| CINAU2598 | √ | √ | √ | √ | √ | √ | √ | √ |
| CINAU2572 | √ | √ | √ | √ | √ | √ | √ | √ |
| CINAU2600 | √ | √ | √ | √ | √ | √ | √ | √ |
| CINAU2612 | √ | √ | - | √ | √ | √ | √ | √ |
| CINAU2615 | √ | - | - | √ | √ | √ | √ | √ |
| CINAU2616 | √ | √ | √ | √ | √ | √ | √ | √ |
| CINAU2617 | √ | - | - | - | √ | √ | √ | √ |
| CINAU2618 | √ | √ | √ | √ | √ | - | √ | √ |
| CINAU2619 | √ | √ | - | √ | - | √ | √ | √ |
| CINAU2620 | √ | √ | √ | √ | - | √ | √ | √ |
| CINAU2622 | √ | - | - | - | √ | √ | √ | √ |
| CINAU2623 | √ | - | √ | - | √ | √ | √ | √ |
| CINAU2625 | √ | - | √ | √ | √ | √ | √ | √ |
| CINAU2630 | √ | - | √ | √ | √ | X | √ | √ |
| CINAU2632 | √ | - | √ | √ | √ | √ | √ | √ |
| CINAU2633 | √ | - | √ | - | √ | √ | √ | √ |
| CINAU2643 | √ | - | √ | √ | √ | √ | √ | √ |
| CINAU2645 | √ | - | - | √ | √ | √ | √ | √ |
| CINAU2646 | √ | √ | √ | √ | √ | √ | √ | √ |
| CINAU2647 | √ | √ | √ | √ | √ | √ | √ | √ |
| CINAU2648 | √ | √ | √ | √ | √ | √ | √ | √ |
| CINAU2650 | √ | √ | √ | √ | √ | √ | √ | √ |
| CINAU2652 | √ | - | - | √ | √ | √ | √ | √ |
| CINAU2658 | √ | - | - | √ | √ | √ | √ | √ |
| CINAU2663 | √ | √ | √ | √ | - | √ | √ | √ |
| CINAU2664 | √ | √ | √ | √ | √ | √ | √ | √ |
| CINAU2665 | √ | √ | √ | √ | √ | √ | √ | √ |
| CINAU2666 | √ | √ | √ | √ | √ | √ | √ | √ |
| CINAU2670 | √ | √ | √ | √ | √ | √ | √ | √ |
| CINAU2690 | √ | √ | √ | √ | √ | √ | √ | √ |
| CINAU2707 | √ | √ | √ | √ | √ | √ | √ | - |
| CINAU2583 | √ | √ | √ | √ | √ | √ | √ | √ |
| CINAU2711 | √ | √ | - | - | √ | √ | √ | √ |
| CINAU2712 | √ | √ | √ | √ | - | - | √ | √ |
| CINAU2719 | √ | √ | √ | √ | √ | - | √ | √ |
| CINAU2755 | √ | √ | - | √ | √ | √ | √ | √ |
| CINAU2588 | √ | √ | √ | √ | √ | √ | √ | √ |



|           |   |   |   |   |   |   |   |   |
|-----------|---|---|---|---|---|---|---|---|
| CINAU2760 | √ | √ | √ | - | √ | √ | √ | √ |
| CINAU2764 | √ | √ | √ | √ | - | - | √ | √ |
| CINAU2767 | √ | √ | √ | √ | √ | √ | √ | √ |
| CINAU2768 | √ | √ | √ | √ | √ | √ | √ | √ |
| CINAU2771 | √ | √ | √ | √ | √ | √ | √ | √ |
| CINAU2591 | √ | √ | √ | √ | √ | √ | √ | √ |
| CINAU2599 | √ | √ | √ | √ | √ | √ | √ | √ |
| CINAU2573 | √ | √ | √ | √ | √ | √ | √ | √ |
| CINAU2611 | √ | √ | √ | √ | √ | √ | √ | √ |
| CINAU2613 | √ | √ | √ | √ | √ | √ | √ | √ |
| CINAU2626 | √ | √ | √ | - | - | √ | √ | √ |
| CINAU2631 | √ | √ | √ | √ | √ | √ | √ | √ |
| CINAU2656 | √ | - | √ | √ | √ | √ | √ | √ |
| CINAU2686 | √ | - | - | √ | √ | √ | √ | √ |
| CINAU2708 | √ | √ | √ | √ | √ | √ | √ | √ |
| CINAU2713 | √ | √ | √ | - | √ | √ | √ | √ |
| CINAU2733 | √ | √ | √ | √ | √ | √ | √ | √ |
| CINAU2756 | √ | √ | √ | √ | √ | √ | √ | √ |
| CINAU2759 | √ | - | √ | - | √ | √ | √ | √ |
| CINAU2763 | √ | - | √ | - | √ | √ | √ | √ |
| CINAU2769 | √ | √ | - | - | - | - | √ | √ |
| CINAU2773 | √ | √ | √ | √ | √ | √ | √ | √ |
| CINAU2785 | √ | √ | √ | √ | √ | √ | √ | √ |
| CINAU2787 | √ | √ | √ | √ | √ | √ | √ | √ |
| CINAU2601 | √ | √ | √ | √ | √ | √ | √ | √ |
| CINAU2605 | √ | √ | √ | √ | √ | √ | √ | √ |
| CINAU2614 | √ | √ | √ | √ | √ | √ | √ | √ |
| CINAU2624 | √ | - | - | √ | √ | √ | √ | √ |
| CINAU2627 | √ | √ | √ | √ | √ | √ | √ | √ |
| CINAU2634 | √ | √ | √ | - | √ | - | √ | √ |
| CINAU2635 | √ | √ | - | √ | √ | √ | √ | √ |
| CINAU2651 | √ | √ | √ | √ | √ | √ | √ | √ |
| CINAU2758 | √ | √ | √ | √ | √ | √ | √ | √ |
| CINAU2762 | √ | √ | X | X | X | √ | √ | √ |
| CINAU2654 | √ | √ | √ | √ | √ | √ | √ | √ |
| CINAU2576 | √ | √ | √ | √ | √ | √ | √ | √ |

Note: √ means the marker has amplicons and polymorphism between common wheat c.v.

Chinese Spring and *Haynaldia villosa* lines or *H. villosa* 6VS additional lines

× means the marker has amplicons but no polymorphism between common wheat c.v.

Chinese Spring and *Haynaldia villosa* lines or *H. villosa* 6VS additional lines

- means data missing or has no amplicons
